# Supplementary material for: Enhanced electrochemical performance of Li3V2(PO4)3 microspheres assembled with nanoparticles embedded in a carbon matrix
Source: Royal Society of Chemistry journal article supplement (doi:10.1039/c5ra01992c), 2015-01-01
Supplement: c5ra01992c1.pdf [file c5ra01992c1.pdf]

## Electronic Supplementary Information (ESI):

# Enhanced electrochemical performances of $\text{Li}_3\text{V}_2(\text{PO}_4)_3$ Microspheres Assembled with Nanoparticles Embedded in Carbon Layer

Hui Chen,<sup>a†</sup> Zong-Kai Wang,<sup>c†</sup> Guo-Dong Li,<sup>b\*</sup> Fei-Fan Guo,<sup>b</sup> Mei-Hong Fan,<sup>b</sup> Xue-Yan Wu,<sup>d</sup> and Xi-Chuan Cao<sup>a\*</sup>

<sup>a</sup> School of Materials Science and Engineering, China University of Mining and Technology, Xuzhou

221000, China E-mail : xichuancao@cumt.edu.cn

<sup>b</sup> State Key Laboratory of Inorganic Synthesis and Preparative Chemistry, College of Chemistry, Jilin

University, 2699 Qianjin Street, Changchun 130012, China E-mail : lgd@jlu.edu.cn

<sup>c</sup> School of Chemistry and Chemical Engineering, Shanghai Jiao Tong University, Shanghai, 200240,

China

<sup>d</sup> School of Materials Science and Engineering, Shanghai Jiao Tong University, Shanghai, 200240,

China

1. **Fig. S1** TG-DSC profiles of LVP@C.
2. **Fig. S2** SEM image of LVP precursor.
3. **Fig. S3** TEM image LVP precursor.
4. **Fig. S4** The 1st, 10th, 50th, and the 100th charge-discharge curves at 10 C.
5. **Fig. S5** Charge-discharge curves from 1 C to 20 C.
6. **Fig. S6** The cycling performance of S4, S8, S12 and Sg at rates of 1 C for 100 cycles.
7. **Fig. S7** AC-impedance spectra of S4, S8 and S12.

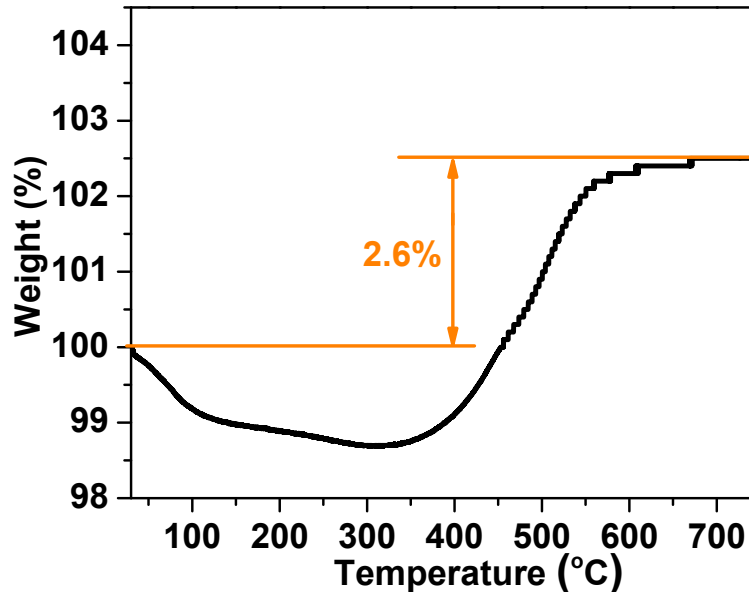

Fig. S1. Thermogravimetric curve of the  $\text{Li}_3\text{V}_2(\text{PO}_4)_3@\text{C}$  composite heated in synthetic air.

Calculation of carbon content: Thermogravimetric analysis was carried out to evaluate carbon content in the composite.  $\text{Li}_3\text{V}_2(\text{PO}_4)_3@\text{C}$  composite was heated from room temperature to 800 °C at a rate of 3 °C min<sup>-1</sup> to remove carbon completely and oxidize V<sup>3+</sup> to V<sup>5+</sup>. And the mass change is caused by the above two factors. According to the reported method,<sup>[1-2]</sup> First, assume the carbon content as x, then LVP was 100-x, when 1 mol LVP was oxidized, 1 mol of oxygen was consumed, and the mass increase 7.8%(100-x). According to the mass conservation law, we can list the equation:  $100-x+7.8\%(100-x) = 102.6$ . Thus the carbon content (x) can be estimated as about 5%. And it is in consistent with the result of ICP-OES about 6%.

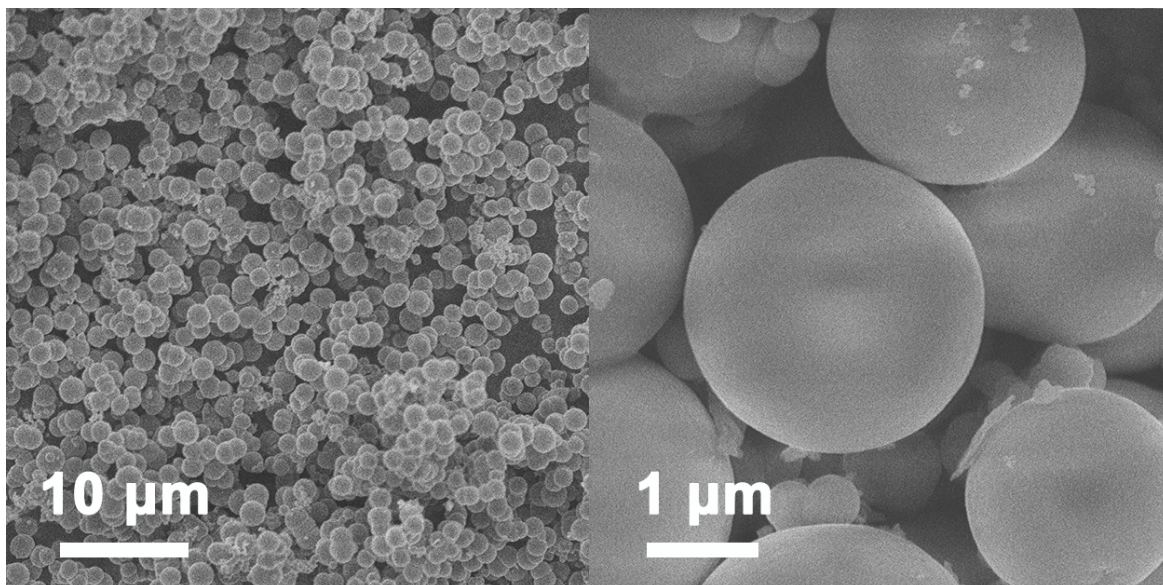

Fig. S2 SEM image of LVP precursor.

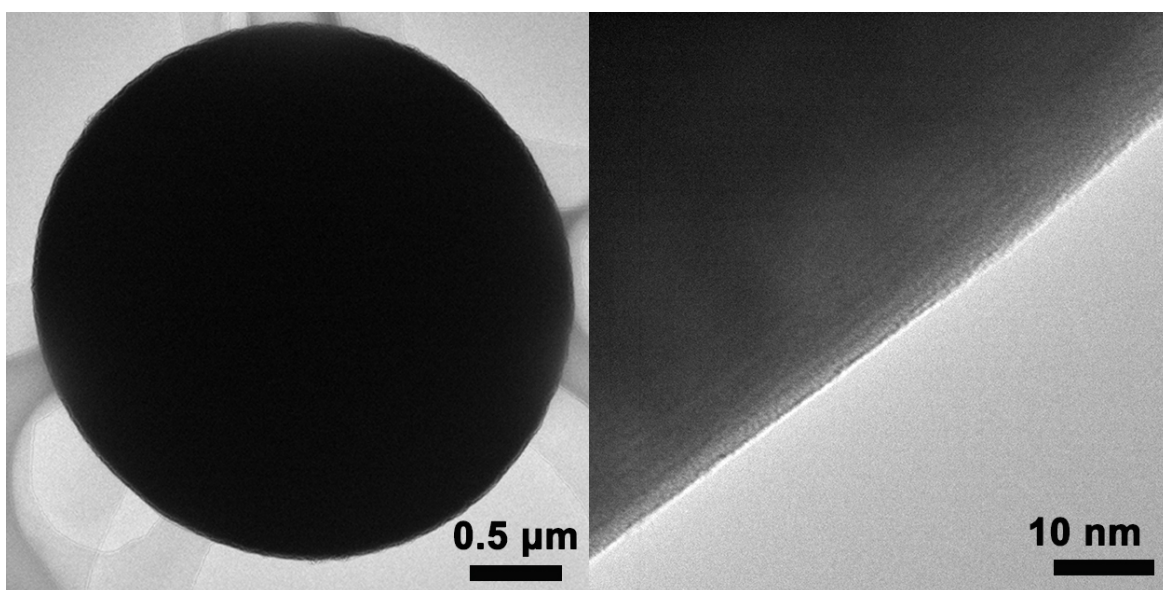

Fig. S3 TEM image of LVP precursor.

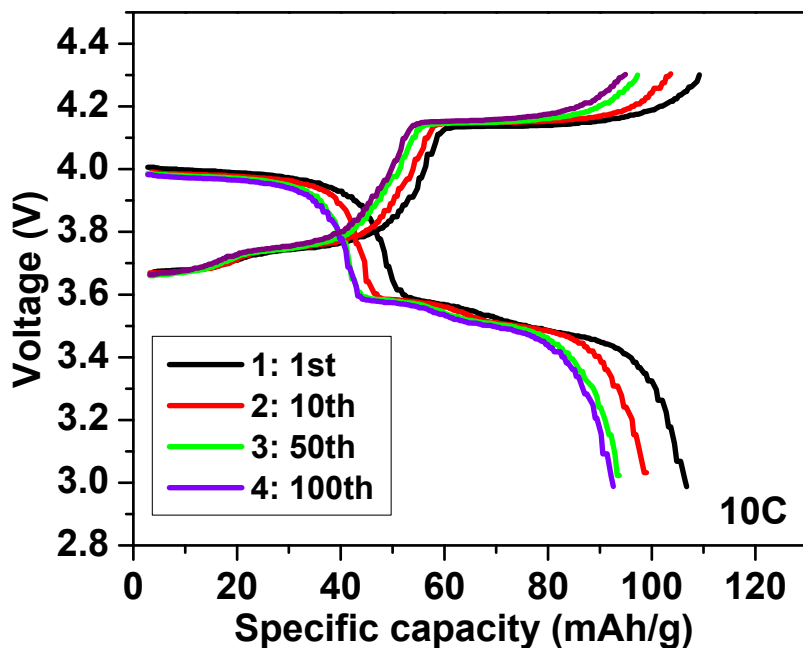

Fig. S4. The 1st, 10th, 50th, and the 100th charge-discharge curves at 10 C over a potential range of 3.0-4.3 V.

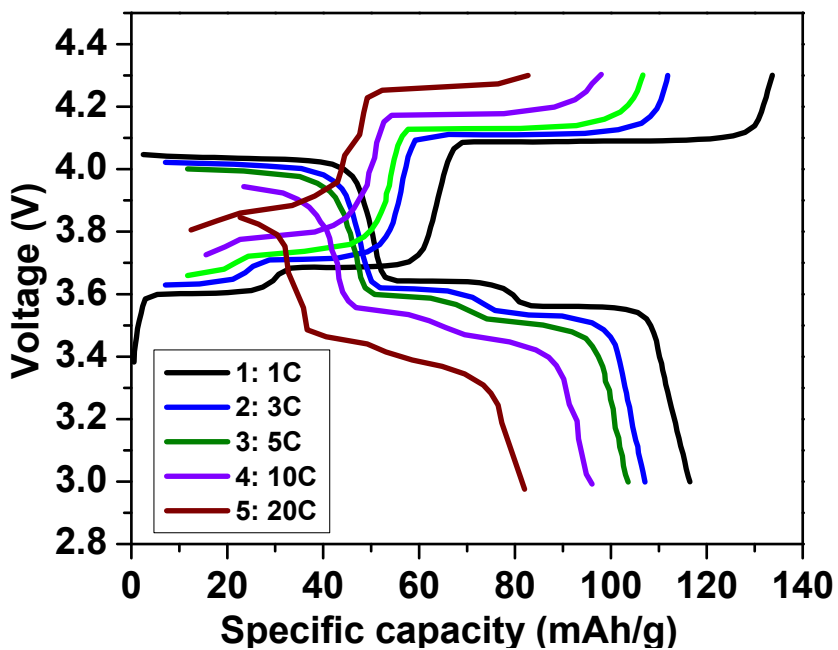

Fig. S5. Charge-discharge curves from 1 C to 20 C over a potential range of 3.0-4.3 V.

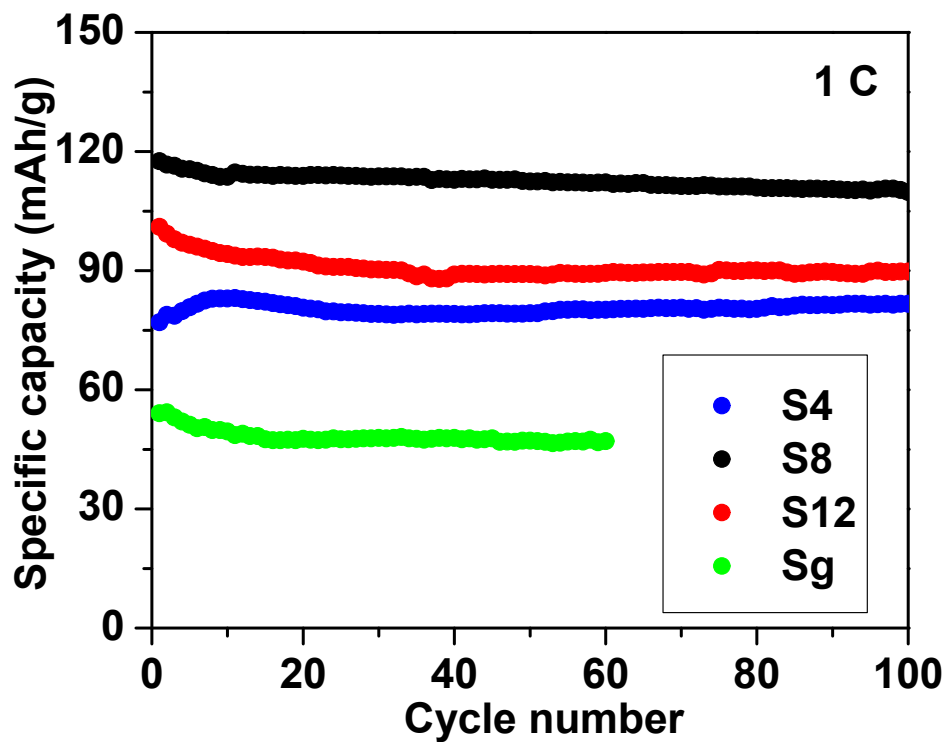

Fig. S6. The cycling performance of S4, S8, S12 and Sg at rates of 1 C over a potential range of 3.0-4.3 V for 100 cycles.

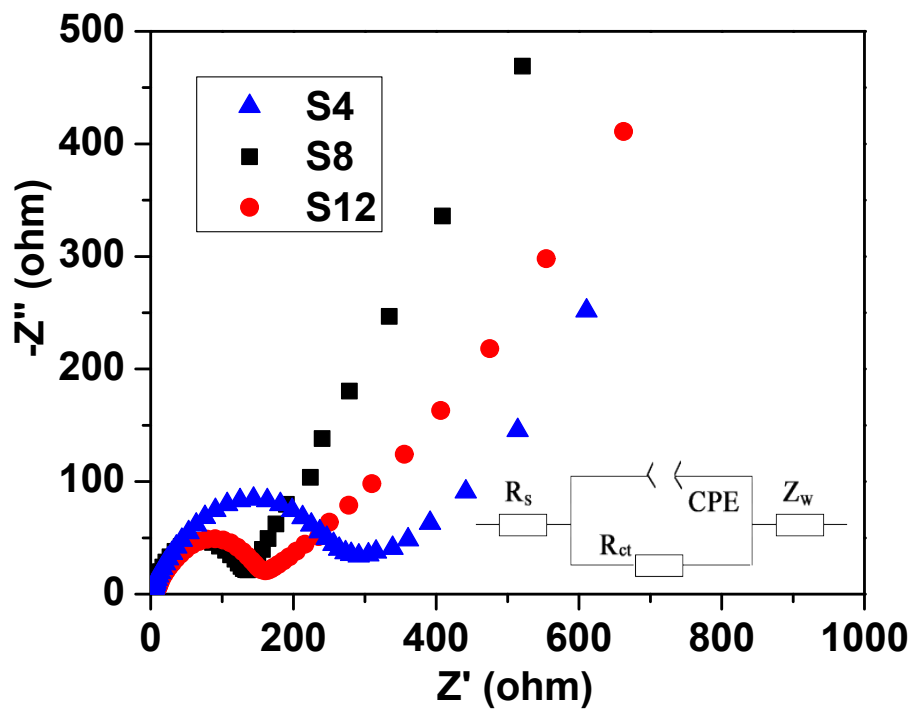

Fig. S7 AC-impedance spectra of S4, S8 and S12.

Reference:

1. J. Chen and M. Whittingham, *Electrochem. Commun.*, 2006, **8**, 855–858.
2. L. Fei, W. Lu, L. Sun, J. Wang, J. Wei, H. L. W. Chan and Y. Wang, *RSC Adv.*, 2013, **3**, 1297–1301.
